# Supplementary material
Source: PubMed Central journal article supplement (PMC6171810)
Supplement: jciinsight-3-122011-s100.pdf [file jciinsight-3-122011-s100.pdf]

## Supplemental Data

**Title:** Polygenic risk score for predicting weight loss after bariatric surgery

**Authors:** Juan de Toro-Martín, PhD; Frédéric Guénard, PhD; André Tchernof, PhD; Louis Pérusse, PhD, Simon Marceau, MD; Marie-Claude Vohl, PhD.

**Table S1. List of 191 BMI-associated SNPs**

**Table S2. List of 186 SNPs in PRS<sub>186</sub>**

**Table S3. List of 11 SNPs in PRS<sub>11</sub>**

**Figure S1. Calibration plots of the prediction models**

**Table S1. List of 191 BMI-associated SNPs**

| SNP        | Minor allele | Major allele | MAF  | HWE P-value | GWAS P-value           | Ref |
|------------|--------------|--------------|------|-------------|------------------------|-----|
| rs1000940  | G            | A            | 0.31 | 0.525       | $1.3 \times 10^{-8}$   | 1   |
| rs10132280 | A            | C            | 0.28 | 0.933       | $1.1 \times 10^{-11}$  | 1   |
| rs10182181 | G            | A            | 0.46 | 0.732       | $8.8 \times 10^{-24}$  | 1   |
| rs10733682 | A            | G            | 0.47 | 0.680       | $1.8 \times 10^{-8}$   | 1   |
| rs10938397 | G            | A            | 0.46 | 0.086       | $3.2 \times 10^{-38}$  | 1   |
| rs10968576 | G            | A            | 0.33 | 0.589       | $6.6 \times 10^{-14}$  | 1   |
| rs11030104 | G            | A            | 0.19 | 0.444       | $5.6 \times 10^{-28}$  | 1   |
| rs11057405 | A            | G            | 0.09 | 0.194       | $2.0 \times 10^{-8}$   | 1   |
| rs11126666 | A            | G            | 0.25 | 0.145       | $1.3 \times 10^{-9}$   | 1   |
| rs11165643 | C            | T            | 0.43 | 0.577       | $2.1 \times 10^{-12}$  | 1   |
| rs11170468 | C            | A            | 0.25 | 0.366       | $7.0 \times 10^{-8}$   | 1   |
| rs11191560 | C            | T            | 0.07 | 0.275       | $8.5 \times 10^{-9}$   | 1   |
| rs11583200 | C            | T            | 0.40 | 0.317       | $1.5 \times 10^{-8}$   | 1   |
| rs1167827  | A            | G            | 0.41 | 0.009       | $6.3 \times 10^{-10}$  | 1   |
| rs11688816 | G            | A            | 0.50 | 0.679       | $1.9 \times 10^{-8}$   | 1   |
| rs11727676 | C            | T            | 0.10 | 0.428       | $2.6 \times 10^{-8}$   | 1   |
| rs11847697 | T            | C            | 0.05 | 1.000       | $4.0 \times 10^{-9}$   | 1   |
| rs12286929 | A            | G            | 0.45 | 0.302       | $1.3 \times 10^{-12}$  | 1   |
| rs12401738 | A            | G            | 0.35 | 0.653       | $1.2 \times 10^{-10}$  | 1   |
| rs12429545 | A            | G            | 0.12 | 0.267       | $1.1 \times 10^{-12}$  | 1   |
| rs12446632 | A            | G            | 0.15 | 0.602       | $1.5 \times 10^{-18}$  | 1   |
| rs12566985 | G            | A            | 0.42 | 0.121       | $3.3 \times 10^{-15}$  | 1   |
| rs12885454 | A            | C            | 0.33 | 0.590       | $1.9 \times 10^{-10}$  | 1   |
| rs12940622 | A            | G            | 0.41 | 0.004       | $2.5 \times 10^{-9}$   | 1   |
| rs13021737 | A            | G            | 0.17 | 0.903       | $1.1 \times 10^{-50}$  | 1   |
| rs13078960 | G            | T            | 0.22 | 0.198       | $1.7 \times 10^{-14}$  | 1   |
| rs13107325 | T            | C            | 0.09 | 0.543       | $1.8 \times 10^{-12}$  | 1   |
| rs13191362 | G            | A            | 0.12 | 0.204       | $7.3 \times 10^{-9}$   | 1   |
| rs13201877 | G            | A            | 0.13 | 1.000       | $4.3 \times 10^{-8}$   | 1   |
| rs1441264  | G            | A            | 0.39 | 0.086       | $3.0 \times 10^{-8}$   | 1   |
| rs1516725  | T            | C            | 0.13 | 1.000       | $1.9 \times 10^{-22}$  | 1   |
| rs1528435  | C            | T            | 0.38 | 0.612       | $1.2 \times 10^{-8}$   | 1   |
| rs1558902  | A            | T            | 0.49 | 0.101       | $7.5 \times 10^{-153}$ | 1   |
| rs16851483 | T            | G            | 0.07 | 0.439       | $3.6 \times 10^{-10}$  | 1   |
| rs16907751 | T            | C            | 0.10 | 0.274       | $3.9 \times 10^{-8}$   | 1   |
| rs16951275 | C            | T            | 0.23 | 0.284       | $1.9 \times 10^{-17}$  | 1   |
| rs17001654 | G            | C            | 0.19 | 0.821       | $7.8 \times 10^{-9}$   | 1   |
| rs17024393 | C            | T            | 0.02 | 1.000       | $7.0 \times 10^{-14}$  | 1   |
| rs17094222 | C            | T            | 0.20 | 0.196       | $5.9 \times 10^{-11}$  | 1   |
| rs17203016 | G            | A            | 0.19 | 0.660       | $3.4 \times 10^{-8}$   | 1   |
| rs17405819 | C            | T            | 0.27 | 0.221       | $2.1 \times 10^{-11}$  | 1   |
| rs17724992 | G            | A            | 0.23 | 0.848       | $3.4 \times 10^{-8}$   | 1   |
| rs1808579  | T            | C            | 0.43 | 0.330       | $4.2 \times 10^{-8}$   | 1   |
| rs1928295  | C            | T            | 0.44 | 0.729       | $7.9 \times 10^{-10}$  | 1   |
| rs2033529  | G            | A            | 0.27 | 0.345       | $1.4 \times 10^{-10}$  | 1   |
| rs2033732  | T            | C            | 0.23 | 0.631       | $4.9 \times 10^{-8}$   | 1   |
| rs205262   | G            | A            | 0.30 | 0.935       | $1.8 \times 10^{-10}$  | 1   |
| rs2075650  | G            | A            | 0.13 | 0.763       | $1.3 \times 10^{-8}$   | 1   |
| rs2080454  | C            | A            | 0.36 | 0.603       | $8.6 \times 10^{-9}$   | 1   |
| rs2112347  | G            | T            | 0.36 | 0.233       | $6.2 \times 10^{-17}$  | 1   |
| rs2121279  | T            | C            | 0.10 | 0.700       | $2.3 \times 10^{-8}$   | 1   |
| rs2176040  | A            | G            | 0.36 | 0.767       | $1.0 \times 10^{-8}$   | 1   |
| rs2176598  | T            | C            | 0.27 | 0.170       | $3.0 \times 10^{-8}$   | 1   |
| rs2207139  | G            | A            | 0.18 | 0.486       | $4.1 \times 10^{-29}$  | 1   |
| rs2245368  | G            | A            | 0.19 | 0.265       | $3.2 \times 10^{-8}$   | 1   |
| rs2287019  | T            | C            | 0.14 | 0.407       | $4.6 \times 10^{-18}$  | 1   |
| rs2365389  | T            | C            | 0.41 | 0.007       | $1.6 \times 10^{-10}$  | 1   |
| rs2820292  | A            | C            | 0.44 | 0.783       | $1.8 \times 10^{-10}$  | 1   |
| rs2836754  | T            | C            | 0.35 | 0.407       | $1.6 \times 10^{-8}$   | 1   |
| rs29941    | A            | G            | 0.31 | 0.149       | $2.4 \times 10^{-8}$   | 1   |
| rs3101336  | T            | C            | 0.32 | 0.938       | $2.7 \times 10^{-26}$  | 1   |
| rs3736485  | A            | G            | 0.49 | 0.682       | $7.4 \times 10^{-9}$   | 1   |
| rs3810291  | G            | A            | 0.33 | 0.877       | $4.8 \times 10^{-15}$  | 1   |

|            |   |   |      |                       |                       |   |
|------------|---|---|------|-----------------------|-----------------------|---|
| rs3817334  | T | C | 0.44 | 0.890                 | 5.2x10 <sup>-17</sup> | 1 |
| rs3849570  | A | C | 0.35 | 0.330                 | 2.6x10 <sup>-8</sup>  | 1 |
| rs3888190  | A | C | 0.39 | 0.072                 | 3.1x10 <sup>-23</sup> | 1 |
| rs4256980  | C | G | 0.38 | 0.052                 | 2.9x10 <sup>-11</sup> | 1 |
| rs4740619  | C | T | 0.43 | 0.714                 | 4.6x10 <sup>-9</sup>  | 1 |
| rs4787491  | G | A | 0.50 | 0.220                 | 2.7x10 <sup>-8</sup>  | 1 |
| rs492400   | C | T | 0.43 | 0.403                 | 6.8x10 <sup>-9</sup>  | 1 |
| rs543874   | G | A | 0.23 | 0.923                 | 2.6x10 <sup>-35</sup> | 1 |
| rs6091540  | T | C | 0.27 | 0.931                 | 2.2x10 <sup>-11</sup> | 1 |
| rs6465468  | T | G | 0.37 | 0.822                 | 5.0x10 <sup>-8</sup>  | 1 |
| rs6477694  | C | T | 0.33 | 0.700                 | 2.7x10 <sup>-8</sup>  | 1 |
| rs6567160  | C | T | 0.29 | 0.502                 | 3.9x10 <sup>-53</sup> | 1 |
| rs657452   | A | G | 0.41 | 0.776                 | 5.5x10 <sup>-13</sup> | 1 |
| rs6804842  | A | G | 0.41 | 0.291                 | 2.5x10 <sup>-9</sup>  | 1 |
| rs7138803  | A | G | 0.38 | 0.043                 | 8.2x10 <sup>-24</sup> | 1 |
| rs7141420  | C | T | 0.46 | 0.731                 | 1.2x10 <sup>-14</sup> | 1 |
| rs7164727  | C | T | 0.31 | 0.335                 | 3.9x10 <sup>-9</sup>  | 1 |
| rs7239883  | G | A | 0.40 | 0.887                 | 1.5x10 <sup>-8</sup>  | 1 |
| rs7243357  | G | T | 0.14 | 0.162                 | 3.9x10 <sup>-8</sup>  | 1 |
| rs758747   | T | C | 0.30 | 0.935                 | 7.5x10 <sup>-10</sup> | 1 |
| rs7599312  | A | G | 0.22 | 0.766                 | 1.2x10 <sup>-10</sup> | 1 |
| rs7715256  | G | T | 0.43 | 0.021                 | 8.9x10 <sup>-9</sup>  | 1 |
| rs7899106  | G | A | 0.05 | 0.132                 | 3.0x10 <sup>-8</sup>  | 1 |
| rs7903146  | T | C | 0.34 | 0.646                 | 1.1x10 <sup>-11</sup> | 1 |
| rs9374842  | G | A | 0.23 | 0.241                 | 2.7x10 <sup>-8</sup>  | 1 |
| rs9400239  | T | C | 0.31 | 0.573                 | 1.6x10 <sup>-8</sup>  | 1 |
| rs9540493  | A | G | 0.41 | 0.049                 | 5.0x10 <sup>-8</sup>  | 1 |
| rs9581854  | T | C | 0.20 | 0.069                 | 2.3x10 <sup>-10</sup> | 1 |
| rs9641123  | C | G | 0.46 | 0.945                 | 2.1x10 <sup>-10</sup> | 1 |
| rs977747   | T | G | 0.40 | 0.620                 | 2.2x10 <sup>-8</sup>  | 1 |
| rs9914578  | G | C | 0.19 | 0.660                 | 2.1x10 <sup>-8</sup>  | 1 |
| rs9925964  | G | A | 0.37 | 0.826                 | 8.1x10 <sup>-10</sup> | 1 |
| rs10838738 | G | A | 0.37 | 0.883                 | 5.0x10 <sup>-9</sup>  | 2 |
| rs11084753 | A | G | 0.34 | 1.000                 | 2.0x10 <sup>-8</sup>  | 2 |
| rs17782313 | C | T | 0.29 | 0.505                 | 5.0x10 <sup>-18</sup> | 2 |
| rs6548238  | T | C | 0.17 | 0.904                 | 1.0x10 <sup>-18</sup> | 2 |
| rs7498665  | G | A | 0.39 | 0.062                 | 5.0x10 <sup>-11</sup> | 2 |
| rs9939609  | A | T | 0.47 | 0.034                 | 4.0x10 <sup>-51</sup> | 2 |
| rs10150332 | C | T | 0.22 | 0.427                 | 3.0x10 <sup>-11</sup> | 3 |
| rs10767664 | T | A | 0.19 | 0.664                 | 5.0x10 <sup>-26</sup> | 3 |
| rs12444979 | T | C | 0.16 | 0.602                 | 3.0x10 <sup>-21</sup> | 3 |
| rs13078807 | G | A | 0.22 | 0.197                 | 4.0x10 <sup>-11</sup> | 3 |
| rs1555543  | A | C | 0.43 | 0.402                 | 4.0x10 <sup>-10</sup> | 3 |
| rs206936   | G | A | 0.22 | 0.368                 | 3.0x10 <sup>-8</sup>  | 3 |
| rs2241423  | A | G | 0.23 | 0.203                 | 1.0x10 <sup>-18</sup> | 3 |
| rs2444217  | G | A | 0.40 | 0.670                 | 9.0x10 <sup>-8</sup>  | 3 |
| rs2815752  | G | A | 0.32 | 0.938                 | 2.0x10 <sup>-22</sup> | 3 |
| rs2867125  | T | C | 0.17 | 0.902                 | 3.0x10 <sup>-49</sup> | 3 |
| rs2890652  | C | T | 0.15 | 0.228                 | 1.0x10 <sup>-10</sup> | 3 |
| rs2922763  | G | T | 0.28 | 4.6x10 <sup>-06</sup> | 6.0x10 <sup>-8</sup>  | 3 |
| rs3764400  | C | T | 0.14 | 0.773                 | 4.0x10 <sup>-7</sup>  | 3 |
| rs4771122  | G | A | 0.26 | 0.032                 | 9.0x10 <sup>-10</sup> | 3 |
| rs4836133  | G | T | 0.47 | 1.2x10 <sup>-06</sup> | 2.0x10 <sup>-9</sup>  | 3 |
| rs4929949  | C | T | 0.49 | 0.306                 | 3.0x10 <sup>-9</sup>  | 3 |
| rs571312   | A | C | 0.28 | 0.309                 | 6.0x10 <sup>-42</sup> | 3 |
| rs713586   | C | T | 0.46 | 0.836                 | 6.0x10 <sup>-22</sup> | 3 |
| rs7359397  | T | C | 0.39 | 0.073                 | 2.0x10 <sup>-20</sup> | 3 |
| rs867559   | G | A | 0.18 | 0.819                 | 1.0x10 <sup>-7</sup>  | 3 |
| rs887912   | T | C | 0.27 | 0.603                 | 2.0x10 <sup>-12</sup> | 3 |
| rs9816226  | A | T | 0.17 | 0.458                 | 2.0x10 <sup>-18</sup> | 3 |
| rs13130484 | T | C | 0.46 | 0.099                 | 6.0x10 <sup>-9</sup>  | 4 |
| rs1514175  | A | G | 0.41 | 0.078                 | 3.0x10 <sup>-11</sup> | 4 |
| rs1561288  | T | C | 0.22 | 1.000                 | 5.0x10 <sup>-8</sup>  | 4 |
| rs7234864  | T | C | 0.32 | 0.695                 | 4.0x10 <sup>-17</sup> | 4 |
| rs9940128  | A | G | 0.50 | 0.152                 | 4.0x10 <sup>-23</sup> | 4 |
| rs10993160 | G | A | 0.04 | 0.621                 | 6.0x10 <sup>-7</sup>  | 5 |

|            |   |   |      |                       |                       |    |
|------------|---|---|------|-----------------------|-----------------------|----|
| rs12149832 | A | G | 0.49 | 0.115                 | 5.0x10 <sup>-22</sup> | 5  |
| rs13034723 | A | G | 0.42 | 0.361                 | 2.0x10 <sup>-8</sup>  | 5  |
| rs2206734  | T | C | 0.18 | 0.061                 | 1.0x10 <sup>-11</sup> | 5  |
| rs2331841  | A | G | 0.49 | 0.339                 | 2.0x10 <sup>-11</sup> | 5  |
| rs4377469  | G | T | 0.11 | 0.860                 | 2.0x10 <sup>-7</sup>  | 5  |
| rs516636   | A | C | 0.23 | 0.923                 | 3.0x10 <sup>-9</sup>  | 5  |
| rs10913469 | C | T | 0.22 | 0.554                 | 6.0x10 <sup>-8</sup>  | 6  |
| rs12970134 | A | G | 0.31 | 0.422                 | 1.0x10 <sup>-12</sup> | 6  |
| rs6265     | T | C | 0.17 | 0.718                 | 5.0x10 <sup>-10</sup> | 6  |
| rs6499640  | G | A | 0.37 | 0.558                 | 4.0x10 <sup>-13</sup> | 6  |
| rs7561317  | A | G | 0.17 | 0.903                 | 4.0x10 <sup>-17</sup> | 6  |
| rs7647305  | T | C | 0.20 | 0.518                 | 7.0x10 <sup>-11</sup> | 6  |
| rs925946   | T | G | 0.32 | 0.309                 | 9.0x10 <sup>-10</sup> | 6  |
| rs7202116  | G | A | 0.47 | 0.028                 | 2.0x10 <sup>-10</sup> | 7  |
| rs10136789 | C | T | 0.12 | 0.509                 | 5.0x10 <sup>-7</sup>  | 8  |
| rs12964056 | T | C | 0.28 | 0.797                 | 7.0x10 <sup>-7</sup>  | 8  |
| rs1542829  | A | G | 0.07 | 0.305                 | 1.0x10 <sup>-8</sup>  | 8  |
| rs8050136  | A | C | 0.47 | 0.047                 | 1.0x10 <sup>-7</sup>  | 8  |
| rs8192472  | T | C | 0.39 | 2.8x10 <sup>-09</sup> | 1.0x10 <sup>-6</sup>  | 8  |
| rs1121980  | A | G | 0.50 | 0.133                 | 4.0x10 <sup>-8</sup>  | 9  |
| rs1106683  | A | G | 0.13 | 0.662                 | 1.0x10 <sup>-7</sup>  | 10 |
| rs1426654  | G | A | 0.01 | 0.002                 | 4.0x10 <sup>-7</sup>  | 11 |
| rs3096490  | A | G | 0.36 | 0.882                 | 5.0x10 <sup>-7</sup>  | 11 |
| rs955423   | C | A | 0.45 | 0.240                 | 3.0x10 <sup>-7</sup>  | 11 |
| rs2275215  | C | T | 0.28 | 0.611                 | 4.0x10 <sup>-7</sup>  | 12 |
| rs17124318 | G | C | 0.05 | 1.000                 | 6.0x10 <sup>-7</sup>  | 13 |
| rs3934834  | T | C | 0.15 | 0.594                 | 6.0x10 <sup>-7</sup>  | 14 |
| rs4432245  | C | T | 0.04 | 0.387                 | 1.0x10 <sup>-6</sup>  | 15 |
| rs11142387 | A | C | 0.46 | 0.837                 | 3.0x10 <sup>-8</sup>  | 16 |
| rs11191580 | C | T | 0.07 | 0.275                 | 4.0x10 <sup>-8</sup>  | 16 |
| rs11671664 | A | G | 0.08 | 0.007                 | 3.0x10 <sup>-12</sup> | 16 |
| rs12229654 | . | T | 0.00 | 1.000                 | 5.0x10 <sup>-9</sup>  | 16 |
| rs12463617 | A | C | 0.17 | 1.000                 | 2.0x10 <sup>-12</sup> | 16 |
| rs12597579 | T | C | 0.05 | 1.000                 | 6.0x10 <sup>-7</sup>  | 16 |
| rs16858082 | C | T | 0.40 | 0.176                 | 4.0x10 <sup>-9</sup>  | 16 |
| rs2237892  | T | C | 0.06 | 1.000                 | 9.0x10 <sup>-13</sup> | 16 |
| rs2531995  | C | T | 0.36 | 0.141                 | 7.0x10 <sup>-8</sup>  | 16 |
| rs2535633  | G | C | 0.43 | 0.296                 | 2.0x10 <sup>-10</sup> | 16 |
| rs261967   | C | A | 0.38 | 0.885                 | 8.0x10 <sup>-13</sup> | 16 |
| rs4776970  | T | A | 0.34 | 0.287                 | 3.0x10 <sup>-7</sup>  | 16 |
| rs574367   | T | G | 0.23 | 0.924                 | 2.0x10 <sup>-19</sup> | 16 |
| rs591166   | A | T | 0.49 | 0.193                 | 7.0x10 <sup>-14</sup> | 16 |
| rs6545814  | G | A | 0.43 | 1.000                 | 1.0x10 <sup>-10</sup> | 16 |
| rs671      | . | G | 0.00 | 1.000                 | 3.0x10 <sup>-11</sup> | 16 |
| rs6893807  | G | A | 0.19 | 0.909                 | 1.0x10 <sup>-6</sup>  | 16 |
| rs9356744  | C | T | 0.30 | 0.463                 | 5.0x10 <sup>-13</sup> | 16 |
| rs9473924  | T | G | 0.25 | 0.787                 | 4.0x10 <sup>-7</sup>  | 16 |
| rs11075990 | G | A | 0.47 | 0.023                 | 2.0x10 <sup>-51</sup> | 17 |
| rs2030323  | A | C | 0.19 | 0.743                 | 6.0x10 <sup>-10</sup> | 17 |
| rs2568958  | G | A | 0.32 | 1.000                 | 2.0x10 <sup>-14</sup> | 17 |
| rs2903492  | G | A | 0.16 | 0.805                 | 6.0x10 <sup>-15</sup> | 17 |
| rs633715   | C | T | 0.23 | 1.000                 | 5.0x10 <sup>-12</sup> | 17 |
| rs8089364  | C | T | 0.30 | 0.412                 | 4.0x10 <sup>-21</sup> | 17 |
| rs987237   | G | A | 0.19 | 0.743                 | 2.0x10 <sup>-11</sup> | 17 |
| rs62033400 | C | T | 0.47 | 0.047                 | 2.0x10 <sup>-14</sup> | 18 |
| rs939583   | C | T | 0.16 | 1.000                 | 1.0x10 <sup>-7</sup>  | 18 |
| rs10261878 | A | C | 0.04 | 0.193                 | 1.0x10 <sup>-10</sup> | 19 |
| rs17817964 | A | G | 0.47 | 0.034                 | 1.0x10 <sup>-10</sup> | 19 |
| rs348495   | A | G | 0.40 | 0.117                 | 2.0x10 <sup>-10</sup> | 19 |
| rs7586879  | T | C | 0.32 | 0.640                 | 4.0x10 <sup>-8</sup>  | 19 |
| rs7708584  | A | G | 0.43 | 0.025                 | 5.0x10 <sup>-14</sup> | 19 |
| rs652722   | T | C | 0.24 | 0.710                 | 8.0x10 <sup>-8</sup>  | 20 |

A total of 167 significant BMI-associated SNPs ( $P < 5 \times 10^{-8}$ ) and 24 SNPs near-significant BMI-associated ( $P < 1 \times 10^{-6}$ ) were selected from 15 previous GWAS (1–15) and 5 GWAS meta-analysis (16–20). SNP: single nucleotide polymorphism. Ref points to the original study reference. MAF: minor allele frequency in the cohort of 860 bariatric patients. HWE P-value: Hardy Weinberg equilibrium P-value. GWAS P-value: original P-value of association with BMI. Grey-shaded SNPs were excluded based on HWE or MAF criteria.

**Table S2. List of 186 SNPs in PRS<sub>186</sub>**

| SNP        | Reported gene | Position     | Minor allele | Major allele | X <sup>2</sup> (P-value) | OR (95% CI)      |
|------------|---------------|--------------|--------------|--------------|--------------------------|------------------|
| rs1000940  | RABEP1        | 17:5223976   | G            | A            | 0.10 (0.75)              | 0.94 (0.66-1.35) |
| rs10132280 | STXBP6        | 14:24998019  | A            | C            | 0.02 (0.89)              | 1.03 (0.72-1.47) |
| rs10136789 | KCNH5         | 14:62889535  | C            | T            | 0.38 (0.54)              | 0.87 (0.55-1.36) |
| rs10150332 | NRXN3         | 14:79470621  | C            | T            | 2.60 (0.11)              | 0.73 (0.50-1.07) |
| rs10182181 | ADCY3         | 2:25003800   | G            | A            | 1.04 (0.31)              | 0.82 (0.55-1.20) |
| rs10261878 | MIR148A       | 7:25910925   | A            | C            | 0.05 (0.81)              | 0.92 (0.47-1.82) |
| rs10733682 | LMX1B         | 9:128500735  | A            | G            | 0.26 (0.61)              | 0.90 (0.61-1.34) |
| rs10767664 | BDNF          | 11:27704439  | T            | A            | 8.44 (0.00)              | 0.54 (0.36-0.82) |
| rs10838738 | MTCH2         | 11:47641497  | G            | A            | 0.35 (0.55)              | 0.90 (0.62-1.29) |
| rs10913469 | RASAL2        | 1:177944384  | C            | T            | 0.23 (0.64)              | 0.91 (0.63-1.32) |
| rs10938397 | GNPDA2        | 4:44877284   | G            | A            | 3.06 (0.08)              | 1.44 (0.96-2.17) |
| rs10968576 | LINGO2        | 9:28404339   | G            | A            | 0.49 (0.48)              | 0.88 (0.61-1.26) |
| rs10993160 | ZNF169        | 9:94306644   | G            | A            | 0.31 (0.58)              | 0.81 (0.39-1.70) |
| rs11030104 | BDNF          | 11:27641093  | G            | A            | 7.33 (0.01)              | 0.57 (0.38-0.86) |
| rs11057405 | CLIP1         | 12:121347850 | A            | G            | 0.69 (0.41)              | 1.21 (0.77-1.92) |
| rs1106683  | intergenic    | 7:131768766  | A            | G            | 0.87 (0.35)              | 1.21 (0.81-1.82) |
| rs11075990 | FTO           | 16:53785981  | G            | A            | 1.22 (0.27)              | 1.26 (0.84-1.89) |
| rs11084753 | KCTD15        | 19:33831232  | A            | G            | 2.67 (0.10)              | 1.36 (0.94-1.97) |
| rs11126666 | KCNK3         | 2:26782315   | A            | G            | 0.00 (0.96)              | 1.01 (0.70-1.45) |
| rs11142387 | KLF9          | 9:70383416   | A            | C            | 2.50 (0.11)              | 0.74 (0.50-1.08) |
| rs11165643 | PTBP2         | 1:96696685   | C            | T            | 0.00 (0.98)              | 1.00 (0.68-1.46) |
| rs11170468 | CPNE8         | 12:37716315  | C            | A            | 2.85 (0.09)              | 0.73 (0.50-1.05) |
| rs11191560 | NT5C2         | 10:104859028 | C            | T            | 0.15 (0.70)              | 1.11 (0.65-1.88) |
| rs11191580 | NT5C2         | 10:103146454 | C            | T            | 0.15 (0.70)              | 1.11 (0.65-1.88) |
| rs1121980  | FTO           | 16:53775335  | A            | G            | 1.17 (0.28)              | 1.27 (0.83-1.94) |
| rs11583200 | ELAVL4        | 1:50332407   | C            | T            | 0.66 (0.42)              | 0.86 (0.59-1.24) |
| rs11671664 | GIPR          | 19:45669020  | A            | G            | 1.44 (0.23)              | 0.71 (0.41-1.24) |
| rs1167827  | HIP1          | 7:75001105   | A            | G            | 0.29 (0.59)              | 0.90 (0.62-1.31) |
| rs11688816 | EHBP1         | 2:62906552   | G            | A            | 0.47 (0.49)              | 0.86 (0.57-1.31) |
| rs11727676 | HHIP          | 4:145878514  | C            | T            | 0.27 (0.60)              | 0.88 (0.55-1.42) |
| rs11847697 | PRKD1         | 14:29584863  | T            | C            | 3.14 (0.08)              | 1.61 (0.95-2.72) |
| rs12149832 | FTO           | 16:53808996  | A            | G            | 1.34 (0.25)              | 1.28 (0.84-1.96) |
| rs12286929 | CADM1         | 11:114527614 | A            | G            | 4.97 (0.03)              | 1.61 (1.06-2.45) |
| rs12401738 | FUBP1         | 1:78219349   | A            | G            | 0.68 (0.41)              | 0.86 (0.59-1.23) |
| rs12429545 | OLFM4         | 13:53000207  | A            | G            | 0.26 (0.61)              | 0.89 (0.58-1.38) |
| rs12444979 | GPRC5B        | 16:19922278  | T            | C            | 0.01 (0.92)              | 0.98 (0.66-1.45) |
| rs12446632 | GPRC5B        | 16:19842890  | A            | G            | 0.22 (0.64)              | 0.91 (0.61-1.36) |
| rs12463617 | TMEM18        | 2:629244     | A            | C            | 2.72 (0.10)              | 1.38 (0.94-2.01) |
| rs12566985 | FPGT-TNNI3K   | 1:74774781   | G            | A            | 2.05 (0.15)              | 1.33 (0.90-1.98) |
| rs12597579 | GP2           | 16:20246545  | T            | C            | 0.68 (0.41)              | 0.77 (0.41-1.43) |
| rs12885454 | PRKD1         | 14:28806589  | A            | C            | 1.52 (0.22)              | 0.80 (0.56-1.14) |
| rs12940622 | RPTOR         | 17:76230166  | A            | G            | 0.36 (0.55)              | 0.89 (0.62-1.29) |
| rs12964056 | MC4R          | 18:60006567  | T            | C            | 1.98 (0.16)              | 0.77 (0.53-1.11) |
| rs12970134 | MC4R          | 18:60217517  | A            | G            | 2.84 (0.09)              | 1.37 (0.95-1.97) |
| rs13021737 | TMEM18        | 2:622348     | A            | G            | 3.29 (0.07)              | 1.42 (0.97-2.08) |
| rs13034723 | KLF9          | 2:190120954  | A            | G            | 0.79 (0.38)              | 1.19 (0.81-1.76) |
| rs13078807 | CADM2         | 3:85835000   | G            | A            | 0.82 (0.37)              | 1.18 (0.82-1.71) |
| rs13078960 | CADM2         | 3:85890280   | G            | T            | 0.75 (0.39)              | 1.18 (0.82-1.69) |
| rs13107325 | SLC39A8       | 4:103407732  | T            | C            | 0.20 (0.66)              | 0.90 (0.56-1.45) |
| rs13130484 | GNPDA2        | 4:45173674   | T            | C            | 3.74 (0.05)              | 1.50 (0.99-2.27) |
| rs13191362 | PARK2         | 6:162953340  | G            | A            | 0.28 (0.60)              | 1.12 (0.74-1.71) |
| rs13201877 | IFNGR1        | 6:137717234  | G            | A            | 0.05 (0.83)              | 0.95 (0.63-1.45) |
| rs1426654  | SLC24A5       | 15:48134287  | G            | A            | 0.69 (0.41)              | 0.42 (0.05-3.29) |
| rs1441264  | MIR548A2      | 13:78478920  | G            | A            | 3.58 (0.06)              | 0.70 (0.48-1.01) |
| rs1514175  | TNNI3K        | 1:74525960   | A            | G            | 1.86 (0.17)              | 1.31 (0.89-1.91) |
| rs1516725  | ETV5          | 3:187306698  | T            | C            | 0.17 (0.68)              | 1.09 (0.72-1.65) |
| rs1528435  | UBE2E3        | 2:181259207  | C            | T            | 0.77 (0.38)              | 0.85 (0.59-1.23) |
| rs1542829  | COL6A5        | 3:130418627  | A            | G            | 0.30 (0.58)              | 0.86 (0.51-1.46) |
| rs1555543  | PTBP2         | 1:96479241   | A            | C            | 0.00 (0.95)              | 1.01 (0.69-1.49) |
| rs1558902  | FTO           | 16:52361075  | A            | T            | 1.09 (0.30)              | 1.25 (0.82-1.90) |
| rs1561288  | POMC          | 2:25146133   | T            | C            | 1.29 (0.26)              | 1.23 (0.86-1.78) |
| rs16851483 | RASA2         | 3:142758126  | T            | G            | 2.81 (0.09)              | 1.52 (0.93-2.47) |
| rs16858082 | GNPDA2        | 4:45173787   | C            | T            | 0.23 (0.64)              | 0.91 (0.63-1.32) |

|            |           |              |   |   |             |                  |
|------------|-----------|--------------|---|---|-------------|------------------|
| rs16907751 | ZBTB10    | 8:81538012   | T | C | 0.68 (0.41) | 0.82 (0.51-1.32) |
| rs16951275 | MAP2K5    | 15:65864222  | C | T | 0.12 (0.73) | 1.07 (0.74-1.54) |
| rs17001654 | SCARB2    | 4:77348592   | G | C | 1.49 (0.22) | 1.26 (0.87-1.84) |
| rs17024393 | GNAT2     | 1:109956211  | C | T | 0.44 (0.51) | 1.32 (0.58-2.97) |
| rs17094222 | HIF1AN    | 10:102385430 | C | T | 1.42 (0.23) | 1.25 (0.87-1.81) |
| rs17124318 | ATG4C     | 1:63015059   | G | C | 1.28 (0.26) | 0.68 (0.35-1.33) |
| rs17203016 | CREB1     | 2:207963763  | G | A | 7.50 (0.01) | 0.56 (0.37-0.85) |
| rs17405819 | HNF4G     | 8:76969139   | C | T | 0.90 (0.34) | 0.84 (0.58-1.21) |
| rs17724992 | PGPEP1    | 19:18315825  | G | A | 2.00 (0.16) | 1.30 (0.90-1.88) |
| rs17782313 | MC4R      | 18:60183864  | C | T | 4.05 (0.04) | 1.45 (1.01-2.08) |
| rs17817964 | FTO       | 16:53794154  | A | G | 1.15 (0.28) | 1.25 (0.83-1.88) |
| rs1808579  | C18orf8   | 18:19358886  | T | C | 0.81 (0.37) | 1.20 (0.81-1.77) |
| rs1928295  | TLR4      | 9:119418304  | C | T | 0.61 (0.43) | 0.86 (0.59-1.26) |
| rs2030323  | BDNF      | 11:27706992  | A | C | 8.07 (0.00) | 0.55 (0.37-0.83) |
| rs2033529  | TDRG1     | 6:40456631   | G | A | 0.03 (0.86) | 1.03 (0.72-1.48) |
| rs2033732  | RALYL     | 8:85242264   | T | C | 0.00 (0.96) | 0.99 (0.68-1.43) |
| rs205262   | C6orf106  | 6:34671142   | G | A | 0.00 (1.00) | 1.00 (0.70-1.44) |
| rs206936   | HMGA1     | 6:34335092   | G | A | 0.08 (0.77) | 0.95 (0.65-1.37) |
| rs2075650  | TOMM40    | 19:50087459  | G | A | 1.11 (0.29) | 0.79 (0.51-1.22) |
| rs2080454  | CBLN1     | 16:47620091  | C | A | 1.57 (0.21) | 0.79 (0.55-1.14) |
| rs2112347  | POC5      | 5:75050998   | G | T | 0.33 (0.56) | 1.11 (0.77-1.60) |
| rs2121279  | LRP1B     | 2:142759755  | T | C | 2.40 (0.12) | 0.67 (0.41-1.11) |
| rs2176040  | LOC646736 | 2:226801046  | A | G | 0.03 (0.85) | 1.04 (0.72-1.49) |
| rs2176598  | HSD17B12  | 11:43820854  | T | C | 0.43 (0.51) | 1.13 (0.79-1.62) |
| rs2206734  | CDKAL1    | 6:20694653   | T | C | 0.09 (0.77) | 0.94 (0.64-1.40) |
| rs2207139  | TFAP2B    | 6:50953449   | G | A | 0.51 (0.47) | 0.87 (0.58-1.28) |
| rs2237892  | KCNQ1     | 11:2818521   | T | C | 1.06 (0.30) | 0.73 (0.40-1.33) |
| rs2241423  | LBXCOR1   | 15:67794500  | A | G | 0.03 (0.87) | 1.03 (0.71-1.49) |
| rs2245368  | PMS2L11   | 7:76446079   | G | A | 0.24 (0.62) | 0.91 (0.62-1.33) |
| rs2275215  | LAMA2     | 6:129540247  | C | T | 0.31 (0.58) | 1.11 (0.77-1.59) |
| rs2287019  | QPCTL     | 19:50894012  | T | C | 3.24 (0.07) | 0.67 (0.43-1.04) |
| rs2331841  | MC4R      | 18:60161404  | A | G | 0.15 (0.70) | 1.08 (0.72-1.63) |
| rs2365389  | FHIT      | 3:61211502   | T | C | 0.05 (0.82) | 0.96 (0.65-1.40) |
| rs2444217  | ADCY9     | 16:3988386   | G | A | 1.35 (0.25) | 1.25 (0.86-1.84) |
| rs2531995  | ADCY9     | 16:3963466   | C | T | 0.47 (0.49) | 1.14 (0.78-1.65) |
| rs2535633  | ITIH4     | 3:52825614   | G | C | 1.30 (0.25) | 0.80 (0.55-1.17) |
| rs2568958  | NEGR1     | 1:72299433   | G | A | 0.69 (0.41) | 0.86 (0.60-1.23) |
| rs261967   | PCSK1     | 5:96514546   | C | A | 0.95 (0.33) | 0.83 (0.58-1.20) |
| rs2815752  | NEGR1     | 1:72346757   | G | A | 0.66 (0.42) | 0.86 (0.60-1.23) |
| rs2820292  | NAV1      | 1:200050910  | A | C | 0.03 (0.87) | 0.97 (0.66-1.43) |
| rs2836754  | ETS2      | 21:39213610  | T | C | 3.78 (0.05) | 1.45 (1.00-2.11) |
| rs2867125  | TMEM18    | 2:622827     | T | C | 3.33 (0.07) | 1.42 (0.97-2.08) |
| rs2890652  | LRP1B     | 2:142202362  | C | T | 1.89 (0.17) | 0.74 (0.49-1.14) |
| rs2903492  | TMEM18    | 2:624678     | G | A | 3.23 (0.07) | 1.42 (0.97-2.07) |
| rs29941    | KCTD15    | 19:39001372  | A | G | 1.16 (0.28) | 1.22 (0.85-1.76) |
| rs3096490  | COL25A1   | 4:109057975  | A | G | 0.00 (0.98) | 1.00 (0.69-1.44) |
| rs3101336  | NEGR1     | 1:72523773   | T | C | 0.56 (0.45) | 0.87 (0.61-1.25) |
| rs348495   | GNPDA2    | 4:45182425   | A | G | 0.32 (0.57) | 0.90 (0.62-1.30) |
| rs3736485  | DMXL2     | 15:49535902  | A | G | 0.18 (0.67) | 0.92 (0.61-1.37) |
| rs3764400  | CBX1      | 17:48046570  | C | T | 0.19 (0.66) | 1.10 (0.73-1.66) |
| rs3810291  | ZC3H4     | 19:52260843  | G | A | 4.18 (0.04) | 0.69 (0.48-0.98) |
| rs3817334  | MTCH2     | 11:47607569  | T | C | 1.77 (0.18) | 0.77 (0.53-1.13) |
| rs3849570  | GBE1      | 3:81874802   | A | C | 0.06 (0.81) | 0.96 (0.66-1.37) |
| rs3888190  | ATP2A1    | 16:28796987  | A | C | 0.08 (0.78) | 0.95 (0.65-1.38) |
| rs3934834  | NR        | 1:1070426    | T | C | 1.48 (0.22) | 0.77 (0.51-1.17) |
| rs4256980  | TRIM66    | 11:8630515   | C | G | 1.09 (0.30) | 1.22 (0.84-1.78) |
| rs4377469  | CCK       | 3:42261582   | G | T | 2.34 (0.13) | 1.39 (0.91-2.14) |
| rs4432245  | EIF2AK4   | 15:40032280  | C | T | 0.30 (0.59) | 0.83 (0.42-1.63) |
| rs4740619  | C9orf93   | 9:15624326   | C | T | 0.23 (0.63) | 1.11 (0.73-1.67) |
| rs4771122  | GTF3A     | 13:27446043  | G | A | 1.76 (0.18) | 1.28 (0.89-1.84) |
| rs4776970  | MAP2K5    | 15:67788548  | T | A | 0.81 (0.37) | 1.18 (0.82-1.70) |
| rs4787491  | INO80E    | 16:29922838  | G | A | 0.67 (0.41) | 1.20 (0.78-1.84) |
| rs492400   | USP37     | 2:219057996  | C | T | 2.61 (0.11) | 0.73 (0.51-1.07) |
| rs4929949  | RPL27A    | 11:8583046   | C | T | 0.24 (0.63) | 0.91 (0.61-1.35) |
| rs516636   | SEC16B    | 1:177886382  | A | C | 2.48 (0.12) | 0.74 (0.51-1.08) |
| rs543874   | SEC16B    | 1:176156103  | G | A | 2.27 (0.13) | 0.75 (0.51-1.09) |

|            |              |              |   |   |             |                  |
|------------|--------------|--------------|---|---|-------------|------------------|
| rs571312   | MC4R         | 18:60172536  | A | C | 5.13 (0.02) | 1.52 (1.06-2.18) |
| rs574367   | SEC16B       | 1:177904075  | T | G | 2.54 (0.11) | 0.74 (0.50-1.07) |
| rs591166   | MC4R         | 18:60174356  | A | T | 0.16 (0.69) | 1.09 (0.72-1.63) |
| rs6091540  | ZFP64        | 20:50521269  | T | C | 2.13 (0.14) | 0.76 (0.53-1.10) |
| rs62033400 | FTO          | 16:53777876  | C | T | 1.30 (0.25) | 1.27 (0.84-1.90) |
| rs6265     | BDNF         | 11:27658369  | T | C | 8.69 (0.00) | 0.52 (0.34-0.81) |
| rs633715   | SEC16B       | 1:177883445  | C | T | 2.86 (0.09) | 0.72 (0.50-1.05) |
| rs6465468  | ASB4         | 7:95007450   | T | G | 0.03 (0.85) | 0.97 (0.67-1.40) |
| rs6477694  | EPB41L4B     | 9:110972163  | C | T | 1.70 (0.19) | 0.79 (0.55-1.13) |
| rs6499640  | FTO          | 16:53735765  | G | A | 0.02 (0.90) | 0.98 (0.68-1.41) |
| rs652722   | PAX6         | 11:31883988  | T | C | 0.00 (0.98) | 1.00 (0.70-1.44) |
| rs6545814  | ADCY3        | 2:24908447   | G | A | 0.30 (0.58) | 0.90 (0.61-1.32) |
| rs6548238  | TMEM18       | 2:634905     | T | C | 2.55 (0.11) | 1.36 (0.93-1.99) |
| rs6567160  | MC4R         | 18:55980115  | C | T | 3.67 (0.06) | 1.42 (0.99-2.05) |
| rs657452   | AGBL4        | 1:49362434   | A | G | 0.00 (0.99) | 1.00 (0.68-1.47) |
| rs6804842  | RARB         | 3:25081441   | A | G | 3.01 (0.08) | 0.72 (0.50-1.04) |
| rs6893807  | LINC00461    | 5:88669203   | G | A | 0.23 (0.63) | 1.10 (0.75-1.61) |
| rs713586   | ADCY3        | 2:24935139   | C | T | 1.27 (0.26) | 0.80 (0.54-1.18) |
| rs7138803  | BCDIN3D      | 12:48533735  | A | G | 1.79 (0.18) | 0.78 (0.54-1.12) |
| rs7141420  | NRXN3        | 14:78969207  | C | T | 4.03 (0.04) | 1.54 (1.01-2.36) |
| rs7164727  | LOC100287559 | 15:70881044  | C | T | 0.69 (0.41) | 1.17 (0.81-1.67) |
| rs7202116  | FTO          | 16:53787703  | G | A | 1.08 (0.30) | 1.24 (0.83-1.87) |
| rs7234864  | MC4R         | 18:60067625  | T | C | 4.30 (0.04) | 1.48 (1.02-2.13) |
| rs7239883  | LOC284260    | 18:38401669  | G | A | 0.79 (0.38) | 0.85 (0.58-1.22) |
| rs7243357  | GRP          | 18:55034299  | G | T | 0.57 (0.45) | 0.85 (0.56-1.29) |
| rs7359397  | AC138894.2   | 16:28874338  | T | C | 0.13 (0.72) | 0.93 (0.64-1.36) |
| rs7498665  | SH2B1        | 16:28871920  | G | A | 0.03 (0.87) | 0.97 (0.67-1.41) |
| rs7561317  | TMEM18       | 2:644953     | A | G | 1.67 (0.20) | 1.29 (0.88-1.88) |
| rs7586879  | ADCY3        | 2:24894108   | T | C | 0.16 (0.69) | 0.93 (0.65-1.33) |
| rs758747   | NLRC3        | 16:3567359   | T | C | 1.02 (0.31) | 0.83 (0.58-1.19) |
| rs7599312  | ERBB4        | 2:213121476  | A | G | 0.63 (0.43) | 1.16 (0.80-1.68) |
| rs7647305  | DGKG         | 3:186116501  | T | C | 0.34 (0.56) | 1.12 (0.77-1.62) |
| rs7708584  | GALNT10      | 5:154163906  | A | G | 0.08 (0.78) | 0.95 (0.65-1.38) |
| rs7715256  | GALNT10      | 5:153518086  | G | T | 0.07 (0.80) | 0.95 (0.65-1.39) |
| rs7899106  | GRID1        | 10:87400884  | G | A | 0.24 (0.62) | 0.85 (0.44-1.63) |
| rs7903146  | TCF7L2       | 10:114748339 | T | C | 0.57 (0.45) | 0.87 (0.61-1.25) |
| rs8050136  | FTO          | 16:53782363  | A | C | 1.13 (0.29) | 1.25 (0.83-1.87) |
| rs8089364  | MC4R         | 18:60191596  | C | T | 1.78 (0.18) | 1.29 (0.89-1.87) |
| rs867559   | LMX1B        | 9:126703046  | G | A | 0.00 (0.98) | 1.01 (0.69-1.48) |
| rs887912   | FANCL        | 2:59075742   | T | C | 1.15 (0.28) | 0.82 (0.57-1.18) |
| rs925946   | BDNF         | 11:27645655  | T | G | 2.67 (0.10) | 1.36 (0.94-1.96) |
| rs9356744  | CDKAL1       | 6:20685255   | C | T | 0.11 (0.74) | 1.06 (0.74-1.52) |
| rs9374842  | LOC285762    | 6:120227364  | G | A | 0.86 (0.35) | 0.84 (0.58-1.22) |
| rs939583   | TMEM18       | 2:622531     | C | T | 3.27 (0.07) | 1.42 (0.97-2.07) |
| rs9400239  | FOXO3        | 6:109084356  | T | C | 0.76 (0.38) | 0.85 (0.59-1.22) |
| rs9473924  | TFAP2B       | 6:50866444   | T | G | 0.02 (0.88) | 0.97 (0.67-1.40) |
| rs9540493  | MIR548X2     | 13:65103705  | A | G | 1.22 (0.27) | 1.25 (0.84-1.85) |
| rs955423   | TENM2        | 5:166292645  | C | A | 0.08 (0.78) | 1.06 (0.71-1.59) |
| rs9581854  | MTIF3        | 13:26915782  | T | C | 0.14 (0.71) | 1.07 (0.74-1.57) |
| rs9641123  | CALCR        | 7:93035668   | C | G | 0.00 (0.97) | 1.01 (0.68-1.50) |
| rs977747   | TAL1         | 1:47457264   | T | G | 0.04 (0.84) | 1.04 (0.71-1.51) |
| rs9816226  | ETV5         | 3:186116710  | A | T | 0.31 (0.57) | 1.12 (0.76-1.65) |
| rs987237   | TFAP2B       | 6:50835337   | G | A | 0.08 (0.78) | 0.95 (0.65-1.38) |
| rs9914578  | SMG6         | 17:1951886   | G | C | 3.75 (0.05) | 0.68 (0.45-1.00) |
| rs9925964  | KAT8         | 16:31037396  | G | A | 1.89 (0.17) | 1.30 (0.89-1.89) |
| rs9939609  | FTO          | 16:53786615  | A | T | 1.33 (0.25) | 1.27 (0.85-1.91) |
| rs9940128  | FTO          | 16:53766842  | A | G | 1.04 (0.31) | 1.25 (0.81-1.91) |

SNPs are listed by NCBI's rs number. SNP: single nucleotide polymorphism. Reported gene: gene reported by authors in the NHGRI-EBI GWAS Catalog. Position: SNP localization (chromosome:base pair) in the reference genome GRCh38/hg38.  $\chi^2$  corresponds to the association results with weight loss group membership. OR (95% CI): odds ratio (95% Confidence Interval).

**Table S3. List of 11 SNPs in PRS<sub>11</sub>**

| SNP        | Reported gene | Position     | Minor allele | Major allele | $\chi^2$ (P-value) | OR (95% CI)      |
|------------|---------------|--------------|--------------|--------------|--------------------|------------------|
| rs6265     | BDNF          | 11:27658369  | T            | C            | 8.69 (0.003)       | 0.52 (0.34-0.81) |
| rs10767664 | BDNF          | 11:27704439  | T            | A            | 8.44 (0.004)       | 0.54 (0.36-0.82) |
| rs2030323  | BDNF          | 11:27706992  | A            | C            | 8.07 (0.004)       | 0.55 (0.37-0.83) |
| rs17203016 | CREB1         | 2:207963763  | G            | A            | 7.50 (0.006)       | 0.56 (0.37-0.85) |
| rs11030104 | BDNF          | 11:27641093  | G            | A            | 7.33 (0.007)       | 0.57 (0.38-0.86) |
| rs571312   | MC4R          | 18:60172536  | A            | C            | 5.13 (0.023)       | 1.52 (1.06-2.18) |
| rs12286929 | CADM1         | 11:114527614 | A            | G            | 4.97 (0.026)       | 1.61 (1.06-2.45) |
| rs7234864  | MC4R          | 18:60067625  | T            | C            | 4.30 (0.038)       | 1.48 (1.02-2.13) |
| rs3810291  | ZC3H4         | 19:52260843  | G            | A            | 4.18 (0.041)       | 0.69 (0.48-0.98) |
| rs17782313 | MC4R          | 18:60183864  | C            | T            | 4.05 (0.044)       | 1.45 (1.01-2.08) |
| rs7141420  | NRXN3         | 14:78969207  | T            | C            | 4.03 (0.045)       | 1.54 (1.01-2.36) |

SNPs are listed by increasing P-value of association with weight loss group membership. Grey-shaded SNPs correspond to SNPs having a significantly higher frequency of the risk allele within the low weight loss (LWL) group. SNP: single nucleotide polymorphism. Reported gene: gene reported by authors in the NHGRI-EBI GWAS Catalog. Position: SNP localization (chromosome:base pair) in the reference genome GRCh38/hg38.  $\chi^2$  corresponds to the association results with weight loss trajectory group. OR (95% CI): odds ratio (95% Confidence Interval).

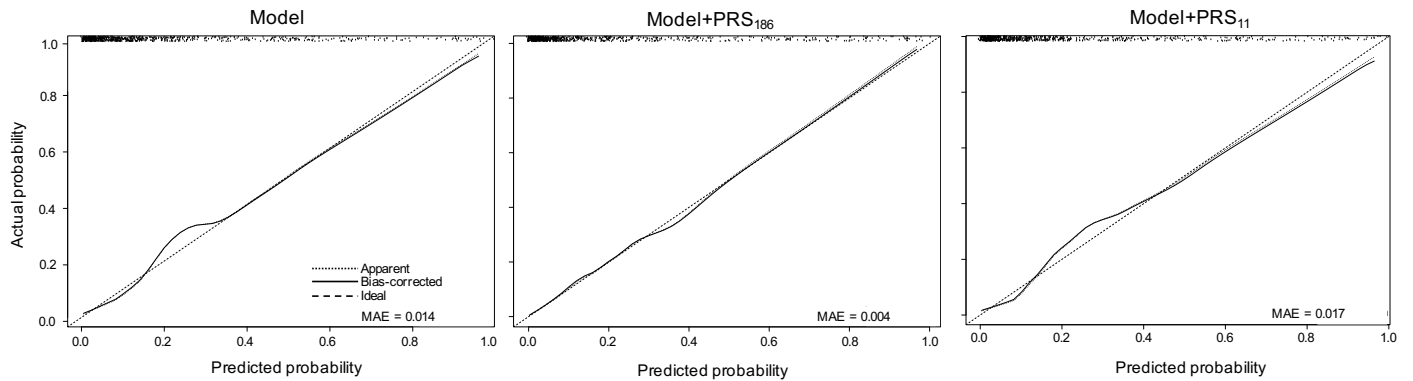

**Figure S1. Calibration plots of the prediction models.** The actual versus the predicted probabilities in the prediction models before and after the inclusion of polygenic risk scores PRS<sub>186</sub> and PRS<sub>11</sub> are plotted (n=767 bariatric patients). The dashed line stands for the ideal prediction, the dotted line indicates the actual prediction, and the solid line represents the bias-corrected prediction after the bootstrap validation procedure (n=1000 repetitions). MAE stands for mean absolute error.



## References

1. Locke AE et al. Genetic studies of body mass index yield new insights for obesity biology. *Nature*. 2015;518(7538):197–206.
2. Willer CJ et al. Six new loci associated with body mass index highlight a neuronal influence on body weight regulation. *Nat Genet*. 2009;41(1):25–34.
3. Speliotes EK et al. Association analyses of 249,796 individuals reveal 18 new loci associated with body mass index. *Nat Genet*. 2010;42(11):937–48.
4. Graff M et al. Genome-wide analysis of BMI in adolescents and young adults reveals additional insight into the effects of genetic loci over the life course. *Hum Mol Genet*. 2013;22(17):3597–607.
5. Okada Y et al. Common variants at CDKAL1 and KLF9 are associated with body mass index in east Asian populations. *Nat Genet*. 2012;44(3):302–6.
6. Thorleifsson G et al. Genome-wide association yields new sequence variants at seven loci that associate with measures of obesity. *Nat Genet*. 2009;41(1):18–24.
7. Yang J et al. FTO genotype is associated with phenotypic variability of body mass index. *Nature*. 2012;490(7419):267–72.
8. Namjou B et al. EMR-linked GWAS study: investigation of variation landscape of loci for body mass index in children. *Front Genet*. 2013;4:268.
9. Loos RJF et al. Common variants near MC4R are associated with fat mass, weight and risk of obesity. *Nat Genet*. 2008;40(6):768–75.
10. Fox CS et al. Genome-wide association to body mass index and waist circumference: the Framingham Heart Study 100K project. *BMC Med Genet*. 2007;8 Suppl 1:S18.
11. Scannell Bryan M et al. Genome-wide association studies and heritability estimates of body mass index related phenotypes in Bangladeshi adults. *PLoS One*. 2014;9(8):e105062.
12. Liu JZ et al. Genome-wide association study of height and body mass index in Australian twin families. *Twin Res Hum Genet*. 2010;13(2):179–93.
13. Croteau-Chonka DC et al. Genome-wide association study of anthropometric traits and evidence of interactions with age and study year in Filipino women. *Obesity (Silver Spring)*. 2011;19(5):1019–27.
14. Johansson A et al. Linkage and genome-wide association analysis of obesity-related phenotypes: association of weight with the MGAT1 gene. *Obesity (Silver Spring)*. 2010;18(4):803–8.
15. Yang F et al. Genome wide association study: searching for genes underlying body mass index in the Chinese. *Biomed Environ Sci*. 2014;27(5):360–70.
16. Wen W et al. Meta-analysis of genome-wide association studies in East Asian-ancestry populations identifies four new loci for body mass index. *Hum Mol Genet*. 2014;23(20):5492–504.
17. Berndt SI et al. Genome-wide meta-analysis identifies 11 new loci for anthropometric traits and provides insights into genetic architecture. *Nat Genet*. 2013;45(5):501–12.
18. Pei Y-F et al. Meta-analysis of genome-wide association data identifies novel susceptibility loci for obesity. *Hum Mol Genet*. 2014;23(3):820–30.
19. Monda KL et al. A meta-analysis identifies new loci associated with body mass index in individuals of African ancestry. *Nat Genet*. 2013;45(6):690–6.
20. Wen W et al. Meta-analysis identifies common variants associated with body mass index in east Asians. *Nat Genet*. 2012;44(3):307–11.
